# Supplementary material for: Oral Insulin-Mimetic Compounds That Act Independently of Insulin
Source: Oxford University Press journal article supplement (doi:10.2337/db06-0269), 2007-01-26
Supplement: onlineappendixpg486supplementarytable1.doc [file onlineappendixpg486supplementarytable1.doc]

8.3+0.5

7.8+0.5

8.3+0.2

Urea

(mM)

50+8

51+4

67+19

Alanine aminotransferase

(mU/ml)

1,147+88

950+100

1,292+95

Amylase

(mU/ml)

B6V10-treated diabetic

Vanadate-treated diabetic

Nondiabetic

**Supplementary Table 1. Plasma concentrations of urea, amilase and alanine aminotransferase in diabetic rats orally treated with hexaquis(benzylammonium) decavanadate.**

Streptozotocin-induced (45 mg/kg) diabetic rats were orally treated with hexaquis(benzylammonium) decavanadate (B6V10) (5 mol/kg from day 0 to day 7 and 10 mol/kg/day from day 7 to day 17) or with decavanadate (V10) (10 mol/kg) delivered by osmotic minipumps. Sham-operated nondiabetic rats were also untreated. After 17 days of treatment, plasma was collected and processed for metabolites and enzyme activity measurements. Values are means  SEM of 6-7 observations per group. Differences among groups did not reach statistical significance.
